# Supplementary material for: PRISMA and BioID disclose a motifs-based interactome of the intrinsically disordered transcription factor C/EBPα
Source: PubMed Central journal article supplement (PMC8220391; doi:10.1016/j.isci.2021.102686), 2021-06-04
Supplement: mmc1.pdf [file mmc1.pdf]

**Supplemental information**

**PRISMA and BiOJD disclose**

**a motifs-based interactome of the intrinsically  
disordered transcription factor C/EBP $\alpha$**

**Evelyn Ramberger, Valeria Sapozhnikova, Elisabeth Kowenz-Leutz, Karin Zimmermann, Nathalie Nicot, Petr V. Nazarov, Daniel Perez-Hernandez, Ulf Reimer, Philipp Mertins, Gunnar Dittmar, and Achim Leutz**

| Position (Human) CEBPA P42 | Position (rat) CEBPA P42 | PTM Type                                                    | PTM included PRISMA screen | Known PTM/Reference (Human)      | Known PTM/Reference (Rat)                                                                                     | known PTM features     | BioID detected | phenotype                                                 |
|----------------------------|--------------------------|-------------------------------------------------------------|----------------------------|----------------------------------|---------------------------------------------------------------------------------------------------------------|------------------------|----------------|-----------------------------------------------------------|
| R12                        | R12                      | methylation                                                 | me2sym, me2asym            |                                  |                                                                                                               |                        | me, me2        |                                                           |
| S21                        | S21                      | phos                                                        | phos                       | PMID:20101026,                   | PMID:26515730, 16807249                                                                                       | phos                   | phos           | disrupts granulocytic differentiation                     |
| R35                        | R35                      | methylation                                                 | me2sym, me2asym            | PMID:31015230                    |                                                                                                               | me                     |                | increased cyclin D1 expression and proliferation          |
| K86                        | K86                      | acetylation<br>methylation                                  | ac,me2                     |                                  |                                                                                                               |                        |                |                                                           |
| K90                        | K90                      | acetylation<br>methylation                                  | ac,me2                     |                                  |                                                                                                               |                        |                |                                                           |
| K92                        | K92                      | acetylation<br>methylation                                  | ac,me2                     |                                  |                                                                                                               |                        |                |                                                           |
| R142                       | R140                     | methylation                                                 | me2sym, me2asym            |                                  |                                                                                                               |                        | me             |                                                           |
| R149                       | R147                     | methylation                                                 | me2sym, me2asym            |                                  |                                                                                                               |                        |                |                                                           |
| R156                       | R154                     | methylation                                                 | me2sym, me2asym            | PMID:31015230                    |                                                                                                               | me, me2                | me             | increased cyclin D1 expression and proliferation          |
| K161                       | K159                     | methylation<br>acetylation<br>ubiquitination<br>sumoylation | ac, me2                    | PMID:19608861<br>PMID:21890473   | <a href="https://doi.org/10.18452/17281">https://doi.org/10.18452/17281</a><br>PMID:22902405<br>PMID:23639777 | me<br>ac<br>ub<br>sumo |                | interaction with HDAC3                                    |
| R165                       | R163                     | citrullination<br>methylation                               | citr, me2sym, me2asym      |                                  | <a href="https://doi.org/10.18452/17281">https://doi.org/10.18452/17281</a>                                   | citr                   |                |                                                           |
| K171                       | K169                     | acetylation<br>methylation                                  | ac, me2                    |                                  |                                                                                                               |                        |                |                                                           |
| S190                       | S193                     | phos                                                        | phos                       | PMID:27619993, 2615376, 15107404 |                                                                                                               | phos                   |                | growth inhibition                                         |
| T226                       | T222                     | phos                                                        | phos                       | PMID:16600022                    | PMID:26153766 , 27619993 , 16600022                                                                           | phos                   |                | regulation of lipogenic and gluconeogenic gene expression |
| T230                       | T226                     | phos                                                        | phos                       | PMID:16600022                    | PMID:16600022                                                                                                 | phos                   |                | regulation of lipogenic and gluconeogenic gene expression |
| S234                       | S230                     | phos                                                        | phos                       | PMID:20101026                    | PMID:17290224, 10567568                                                                                       | phos                   |                |                                                           |
| K254                       | K250                     | acetylation<br>methylation                                  | ac,me2                     |                                  |                                                                                                               |                        |                |                                                           |
| R264                       | R260                     | methylation                                                 | me2sym, m2asym             |                                  |                                                                                                               |                        |                |                                                           |
| S266                       | G262                     | phos                                                        | phos                       | PMID:25159151                    |                                                                                                               | phos                   |                |                                                           |
| K352                       | K352                     | acetylation<br>methylation                                  | ac,me2                     |                                  |                                                                                                               |                        |                |                                                           |

**Table S1: CEBPA PTMs included in PRISMA, related to Figure 1**

| #  | sequence                   | unmodified sequence | region | AA start | AA end | modification         | number interactors |
|----|----------------------------|---------------------|--------|----------|--------|----------------------|--------------------|
| 1  | MESADFYEAEP RPPM           | MESADFYEAEP RPPM    | CR2    | 1        | 15     |                      | 284                |
| 2  | M-Nterm.ac-ESADFYEAEP RPPM | MESADFYEAEP RPPM    | CR2    | 1        | 15     | ('1', 'N-term ac')   | 265                |
| 3  | MESADFYEAEP R-me2_sym-PPM  | MESADFYEAEP RPPM    | CR2    | 1        | 15     | ('12', 'me2_sym')    | 231                |
| 4  | MESADFYEAEP R-me2_asym-PPM | MESADFYEAEP RPPM    | CR2    | 1        | 15     | ('12', 'me2_asym')   | 223                |
| 5  | EAEPRPPMSSHLQSP            | EAEPRPPMSSHLQSP     |        | 8        | 22     |                      | 1                  |
| 6  | EAEPR-me2_sym-PPMSSHLQSP   | EAEPRPPMSSHLQSP     |        | 8        | 22     | ('12', 'me2_sym')    | 2                  |
| 7  | EAEPRPPMSSHLQS-phos-P      | EAEPRPPMSSHLQSP     |        | 8        | 22     | ('21', 'phos')       | 6                  |
| 8  | EAEPR-me2_asym-PPMSSHLQSP  | EAEPRPPMSSHLQSP     |        | 8        | 22     | ('12', 'me2_asym')   | 14                 |
| 9  | MSSHLQSPPHAPSSA            | MSSHLQSPPHAPSSA     |        | 15       | 29     |                      | 0                  |
| 10 | MSSHLQS-phos-PPHAPSSA      | MSSHLQSPPHAPSSA     |        | 15       | 29     | ('21', 'phos')       | 0                  |
| 11 | PPHAPSSAAAFGFPRG           | PPHAPSSAAAFGFPRG    |        | 22       | 36     |                      | 0                  |
| 12 | PPHAPSSAAAFGFPR-me2_sym-G  | PPHAPSSAAAFGFPRG    |        | 22       | 36     | ('35', 'me2_sym')    | 1                  |
| 13 | PPHAPSSAAAFGFPR-me2_asym-G | PPHAPSSAAAFGFPRG    |        | 22       | 36     | ('35', 'me2_asym')   | 0                  |
| 14 | AAFGFPRGAGPAQPP            | AAFGFPRGAGPAQPP     |        | 29       | 43     |                      | 14                 |
| 15 | AAFGFPR-me2_sym-GAGPAQPP   | AAFGFPRGAGPAQPP     |        | 29       | 43     | ('35', 'me2_sym')    | 17                 |
| 16 | AAFGFPR-me2_asym-GAGPAQPP  | AAFGFPRGAGPAQPP     |        | 29       | 43     | ('35', 'me2_asym')   | 15                 |
| 17 | GAGPAQPAPPAAPE             | GAGPAQPAPPAAPE      |        | 36       | 50     |                      | 1                  |
| 18 | PAPPAAPEPLGGICE            | PAPPAAPEPLGGICE     | CR3    | 43       | 57     |                      | 1                  |
| 19 | EPLGGICEHETSIDI            | EPLGGICEHETSIDI     | CR3    | 50       | 64     |                      | 48                 |
| 20 | EHETSIDISAYIDPA            | EHETSIDISAYIDPA     | CR3    | 57       | 71     |                      | 106                |
| 21 | ISAYIDPAAFNDEFL            | ISAYIDPAAFNDEFL     | CR3    | 64       | 78     |                      | 296                |
| 22 | AAFNDEFLADLFQHS            | AAFNDEFLADLFQHS     | CR4    | 71       | 85     |                      | 301                |
| 23 | LADLFQHSRQEQEKAK           | LADLFQHSRQEQEKAK    |        | 78       | 92     |                      | 0                  |
| 24 | LADLFQHSRQEQEK-ac-AK       | LADLFQHSRQEQEKAK    |        | 78       | 92     | ('90', 'ac')         | 8                  |
| 25 | LADLFQHSR-me2_asym-QQEKAK  | LADLFQHSRQEQEKAK    |        | 78       | 92     | ('86', 'me2_asym')   | 0                  |
| 26 | LADLFQHSR-me2_sym-QQEKAK   | LADLFQHSRQEQEKAK    |        | 78       | 92     | ('86', 'me2_sym')    | 1                  |
| 27 | LADLFQHSRQEQEK-me2-AK      | LADLFQHSRQEQEKAK    |        | 78       | 92     | ('90', 'me2')        | 0                  |
| 28 | SRQEQEKAKAAVGPTG           | SRQEQEKAKAAVGPTG    |        | 85       | 99     |                      | 0                  |
| 29 | SRQEQEKAK-me2-AAVGPTG      | SRQEQEKAKAAVGPTG    |        | 85       | 99     | ('92', 'me2')        | 0                  |
| 30 | SR-me2_asym-QQEKAKAAVGPTG  | SRQEQEKAKAAVGPTG    |        | 85       | 99     | ('86', 'me2_asym')   | 0                  |
| 31 | SR-me2_sym-QQEKAKAAVGPTG   | SRQEQEKAKAAVGPTG    |        | 85       | 99     | ('86', 'me2_sym')    | 0                  |
| 32 | SRQEQEK-ac-AKAAVGPTG       | SRQEQEKAKAAVGPTG    |        | 85       | 99     | ('90', 'ac')         | 0                  |
| 33 | SRQEQEKAK-ac-AAVGPTG       | SRQEQEKAKAAVGPTG    |        | 85       | 99     | ('92', 'ac')         | 0                  |
| 34 | SRQEQEK-me2-AKAAVGPTG      | SRQEQEKAKAAVGPTG    |        | 85       | 99     | ('90', 'me2')        | 0                  |
| 35 | K-ac-AAVGPTGGGGGGDF        | KAAGVPTGGGGGGDF     |        | 92       | 106    | ('92', 'ac')         | 11                 |
| 36 | GGGGGGDFDYPGAPA            | GGGGGGDFDYPGAPA     | CR5    | 99       | 113    |                      | 33                 |
| 37 | FDYPGAPAGPGGAVM            | FDYPGAPAGPGGAVM     |        | 106      | 120    |                      | 7                  |
| 38 | AGPGGAVMPGGAHGP            | AGPGGAVMPGGAHGP     |        | 113      | 127    |                      | 5                  |
| 39 | MPGGAHPPPGYGCA             | MPGGAHPPPGYGCA      |        | 120      | 134    |                      | 14                 |
| 40 | M-Nterm.ac-PGGAHPPPGYGCA   | MPGGAHPPPGYGCA      |        | 120      | 134    | ('120', 'N-term ac') | 8                  |
| 41 | PPPGYGCAAGYLDG             | PPPGYGCAAGYLDG      | CR1L   | 127      | 141    |                      | 16                 |
| 42 | AAAGYLDGRLEPLYE            | AAAGYLDGRLEPLYE     | CR1L   | 134      | 148    |                      | 172                |
| 43 | AAAGYLDGR-me2_asym-LEPLYE  | AAAGYLDGRLEPLYE     | CR1L   | 134      | 148    | ('142', 'me2_asym')  | 205                |
| 44 | AAAGYLDGR-me2_sym-LEPLYE   | AAAGYLDGRLEPLYE     | CR1L   | 134      | 148    | ('142', 'me2_sym')   | 271                |
| 45 | GRLEPLYERVGAPAL            | GRLEPLYERVGAPAL     | CR1L   | 141      | 155    |                      | 6                  |
| 46 | GR-me2_asym-LEPLYERVGAPAL  | GRLEPLYERVGAPAL     | CR1L   | 141      | 155    | ('142', 'me2_asym')  | 9                  |
| 47 | GR-me2_sym-LEPLYERVGAPAL   | GRLEPLYERVGAPAL     | CR1L   | 141      | 155    | ('142', 'me2_sym')   | 2                  |
| 48 | GRLEPLYER-me2_asym-VGAPAL  | GRLEPLYERVGAPAL     | CR1L   | 141      | 155    | ('149', 'me2_asym')  | 5                  |
| 49 | GRLEPLYER-me2_sym-VGAPAL   | GRLEPLYERVGAPAL     | CR1L   | 141      | 155    | ('149', 'me2_sym')   | 1                  |
| 50 | ERVGAPALRPLVIKQ            | ERVGAPALRPLVIKQ     |        | 148      | 162    |                      | 0                  |
| 51 | ER-me2_asym-VGAPALRPLVIKQ  | ERVGAPALRPLVIKQ     |        | 148      | 162    | ('149', 'me2_asym')  | 1                  |
| 52 | ERVGAPALR-me2_sym-PLVIKQ   | ERVGAPALRPLVIKQ     |        | 148      | 162    | ('156', 'me2_sym')   | 3                  |
| 53 | ERVGAPALR-me2_asym-PLVIKQ  | ERVGAPALRPLVIKQ     |        | 148      | 162    | ('156', 'me2_asym')  | 1                  |
| 54 | ERVGAPALRPLVIK-me2-Q       | ERVGAPALRPLVIKQ     |        | 148      | 162    | ('161', 'me2')       | 0                  |
| 55 | ERVGAPALRPLVIK-ac-Q        | ERVGAPALRPLVIKQ     |        | 148      | 162    | ('161', 'ac')        | 1                  |
| 56 | LRPLVIKQEPREDE             | LRPLVIKQEPREDE      | CR6    | 155      | 169    |                      | 8                  |
| 57 | LR-me2_sym-PLVIKQEPREDE    | LRPLVIKQEPREDE      | CR6    | 155      | 169    | ('156', 'me2_sym')   | 31                 |
| 58 | LR-me2_asym-PLVIKQEPREDE   | LRPLVIKQEPREDE      | CR6    | 155      | 169    | ('156', 'me2_asym')  | 19                 |
| 59 | LRPLVIKQEP R-me2_sym-EEDE  | LRPLVIKQEPREDE      | CR6    | 155      | 169    | ('164', 'me2_sym')   | 26                 |
| 60 | LRPLVIK-me2-QEPREDE        | LRPLVIKQEPREDE      | CR6    | 155      | 169    | ('161', 'me2')       | 16                 |

|     |                           |                  |      |     |     |                     |     |
|-----|---------------------------|------------------|------|-----|-----|---------------------|-----|
| 61  | LRPLVIK-ac-QEPREED        | LRPLVIKQEPREED   | CR6  | 155 | 169 | ('161', 'ac')       | 47  |
| 62  | LRPLVIKQEP-me2_asym-EED   | LRPLVIKQEPREED   | CR6  | 155 | 169 | ('164', 'me2_asym') | 12  |
| 63  | LRPLVIKQEP-citr-EED       | LRPLVIKQEPREED   | CR6  | 155 | 169 | ('164', 'citr')     | 53  |
| 64  | QEPREDEAK-me2-QLALA       | QEPREDEAKQLALA   |      | 162 | 176 | ('171', 'me2')      | 26  |
| 65  | QEPREDEAK-ac-QLALA        | QEPREDEAKQLALA   |      | 162 | 176 | ('171', 'ac')       | 41  |
| 66  | QEP-me2_asym-EDEAKQLALA   | QEPREDEAKQLALA   |      | 162 | 176 | ('164', 'me2_asym') | 6   |
| 67  | QEP-citr-EDEAKQLALA       | QEPREDEAKQLALA   |      | 162 | 176 | ('164', 'citr')     | 26  |
| 68  | EAKQLALAGLFPYQP           | EAKQLALAGLFPYQP  |      | 169 | 183 |                     | 2   |
| 69  | EAK-ac-QLALAGLFPYQP       | EAKQLALAGLFPYQP  |      | 169 | 183 | ('171', 'ac')       | 8   |
| 70  | EAK-me2-QLALAGLFPYQP      | EAKQLALAGLFPYQP  |      | 169 | 183 | ('171', 'me2')      | 1   |
| 71  | AGLFPYQPPPPPPS            | AGLFPYQPPPPPPS   |      | 176 | 190 |                     | 37  |
| 72  | PPPPPPSHPHPHPP            | PPPPPPSHPHPHPP   |      | 183 | 197 |                     | 7   |
| 73  | PPPPPPS-phos-HPHPHP       | PPPPPPSHPHPHPP   |      | 183 | 197 | ('190', 'phos')     | 1   |
| 74  | SHPHPHPPAHLAAP            | SHPHPHPPAHLAAP   |      | 190 | 204 |                     | 0   |
| 75  | S-phos-HPHPHPAHLAAP       | SHPHPHPPAHLAAP   |      | 190 | 204 | ('190', 'phos')     | 0   |
| 76  | PPAHLAAPHLQFQIA           | PPAHLAAPHLQFQIA  | CR7  | 197 | 211 |                     | 2   |
| 77  | PHLQFQIAHCGQTM            | PHLQFQIAHCGQTM   | CR7  | 204 | 218 |                     | 0   |
| 78  | AHCGQTMHLQPGHP            | AHCGQTMHLQPGHP   | CR7  | 211 | 225 |                     | 0   |
| 79  | MHLQPGHPTPPPTPV           | MHLQPGHPTPPPTPV  | CR7  | 218 | 232 |                     | 1   |
| 80  | MHLQPGHPT-phos-PPPTPV     | MHLQPGHPTPPPTPV  | CR7  | 218 | 232 | ('226', 'phos')     | 2   |
| 81  | MHLQPGHPTPPPT-phos-PV     | MHLQPGHPTPPPTPV  | CR7  | 218 | 232 | ('230', 'phos')     | 4   |
| 82  | PTPPPTVPSPHPAP            | PTPPPTVPSPHPAP   | CR7  | 225 | 239 |                     | 2   |
| 83  | PT-phos-PPPTVPSPHPAP      | PTPPPTVPSPHPAP   | CR7  | 225 | 239 | ('226', 'phos')     | 0   |
| 84  | PTPPPT-phos-PVSPHPAP      | PTPPPTVPSPHPAP   | CR7  | 225 | 239 | ('230', 'phos')     | 1   |
| 85  | PTPPPTVPS-phos-PHPAP      | PTPPPTVPSPHPAP   | CR7  | 225 | 239 | ('234', 'phos')     | 0   |
| 86  | VPSHPAPALGAAGL            | VPSHPAPALGAAGL   |      | 232 | 246 |                     | 1   |
| 87  | VPS-phos-PHPAPALGAAGL     | VPSHPAPALGAAGL   |      | 232 | 246 | ('234', 'phos')     | 0   |
| 88  | PALGAAGLPGPGSAL           | PALGAAGLPGPGSAL  |      | 239 | 253 |                     | 1   |
| 89  | LPGPGSALKGLGAAH           | LPGPGSALKGLGAAH  |      | 246 | 260 |                     | 0   |
| 90  | LPGPGSALK-ac-GLGAAH       | LPGPGSALKGLGAAH  |      | 246 | 260 | ('254', 'ac')       | 0   |
| 91  | LPGPGSALK-me2-GLGAAH      | LPGPGSALKGLGAAH  |      | 246 | 260 | ('254', 'me2')      | 0   |
| 92  | LKGLGAAHPDLRASG           | LKGLGAAHPDLRASG  |      | 253 | 267 |                     | 0   |
| 93  | LK-me2-GLGAAHPDLRASG      | LKGLGAAHPDLRASG  |      | 253 | 267 | ('254', 'me2')      | 0   |
| 94  | LK-ac-GLGAAHPDLRASG       | LKGLGAAHPDLRASG  |      | 253 | 267 | ('254', 'ac')       | 0   |
| 95  | LKGLGAAHPDLRAS-phos-G     | LKGLGAAHPDLRASG  |      | 253 | 267 | ('266', 'phos')     | 0   |
| 96  | LKGLGAAHPDLR-me2_sym-ASG  | LKGLGAAHPDLRASG  |      | 253 | 267 | ('264', 'me2_sym')  | 5   |
| 97  | LKGLGAAHPDLR-me2_asym-ASG | LKGLGAAHPDLRASG  |      | 253 | 267 | ('264', 'me2_asym') | 0   |
| 98  | HPDLRASGGSGAGKA           | HPDLRASGGSGAGKA  |      | 260 | 274 |                     | 0   |
| 99  | HPDLR-me2_asym-ASGGSGAGKA | HPDLRASGGSGAGKA  |      | 260 | 274 | ('264', 'me2_asym') | 0   |
| 100 | HPDLRAS-phos-GSGAGKA      | HPDLRASGGSGAGKA  |      | 260 | 274 | ('266', 'phos')     | 0   |
| 101 | HPDLR-me2_sym-ASGGSGAGKA  | HPDLRASGGSGAGKA  |      | 260 | 274 | ('264', 'me2_sym')  | 0   |
| 102 | GGSGAGKAKKSVDKN           | GGSGAGKAKKSVDKN  | BZIP | 267 | 281 |                     | 0   |
| 103 | AKKSVDKNSNEYRVR           | AKKSVDKNSNEYRVR  | BZIP | 274 | 288 |                     | 0   |
| 104 | NSNEYRVRERNNIA            | NSNEYRVRERNNIA   | BZIP | 281 | 295 |                     | 5   |
| 105 | RRERNNIAVRKSRDK           | RRERNNIAVRKSRDK  | BZIP | 288 | 302 |                     | 126 |
| 106 | AVRKSVDKAKQRNVE           | AVRKSVDKAKQRNVE  | BZIP | 295 | 309 |                     | 243 |
| 107 | KAKQRNVEVETQQVLE          | KAKQRNVEVETQQVLE | BZIP | 302 | 316 |                     | 1   |
| 108 | ETQQVLELTSNDNR            | ETQQVLELTSNDNR   | BZIP | 309 | 323 |                     | 2   |
| 109 | ELTSDNDRLRKRVEQ           | ELTSDNDRLRKRVEQ  | BZIP | 316 | 330 |                     | 1   |
| 110 | RLRKRVEQLSRELDT           | RLRKRVEQLSRELDT  | BZIP | 323 | 337 |                     | 1   |
| 111 | QLSRELDTLRGIFRQ           | QLSRELDTLRGIFRQ  | BZIP | 330 | 344 |                     | 1   |
| 112 | TLRGIFRQLPESSLV           | TLRGIFRQLPESSLV  | BZIP | 337 | 351 |                     | 1   |
| 113 | QLPESSLVKAMGNCA           | QLPESSLVKAMGNCA  |      | 344 | 358 |                     | 0   |
| 114 | QLPESSLVK-me2-AMGNCA      | QLPESSLVKAMGNCA  |      | 344 | 358 | ('352', 'me2')      | 0   |

**Table S2: CEBPA peptides screened for interactions with PRISMA, related to Figure 1 and STAR methods**

List of peptides included in the PRISMA screen. Membership of peptide sequence to CEBPA conserved region (CR) is indicated and CR sequences (Leutz et al., 2011) are highlighted in color. BZIP = basic leucine zipper

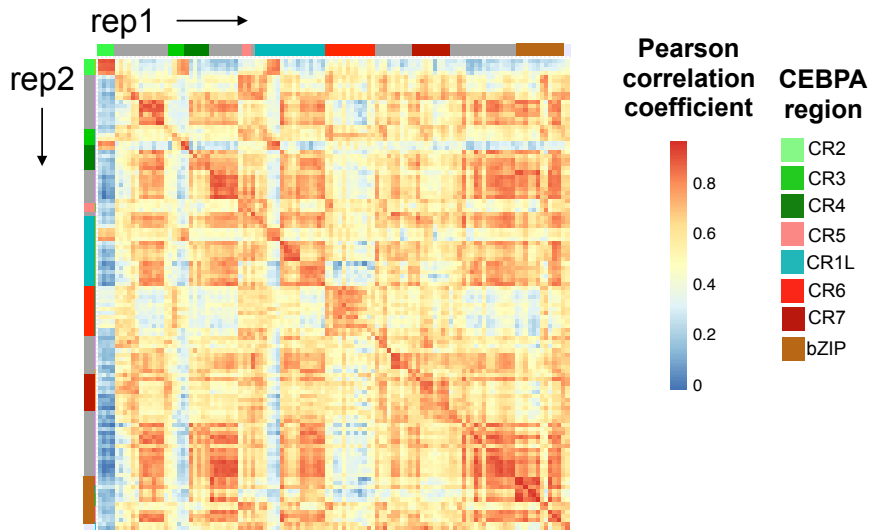

**Figure S1: Pearson correlation matrix of PRISMA replicates, Related to Figure 1**

Pearson correlation of log<sub>2</sub> LFQ values in each PRISMA spot (114 spots). Replicate 1 is plotted against replicate 2. Annotation bars indicates conserved regions of CEBPA.

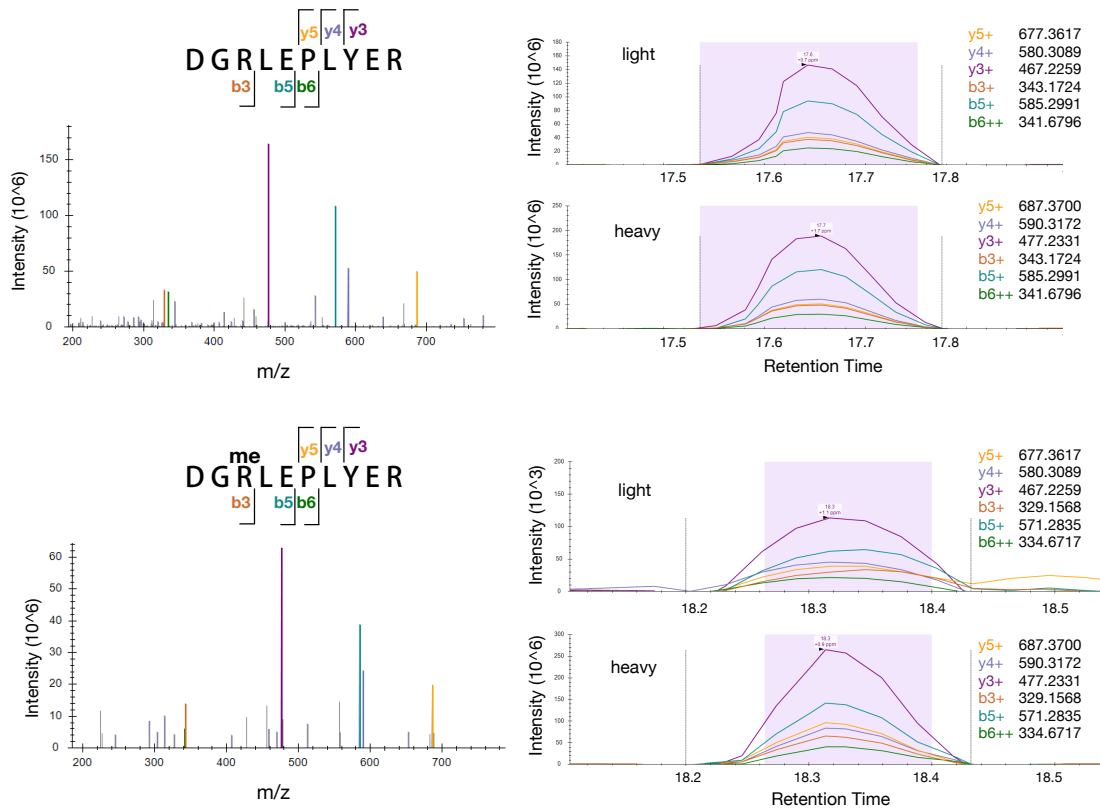

**Figure S2: CEBPA is methylated at R142, Related to Figure 1 and 3**

Parallel reaction monitoring (PRM) of unmodified (top) and methylated (bottom) peptides spanning R142. A heavy peptide standard isotopically labeled at the C-terminal arginine was used to confirm the identity of the peptide. Left: MS2 spectrum of heavy peptide standard; right: elution profile of MS2 fragments of light and heavy peptides. PRM data was analyzed with Skyline

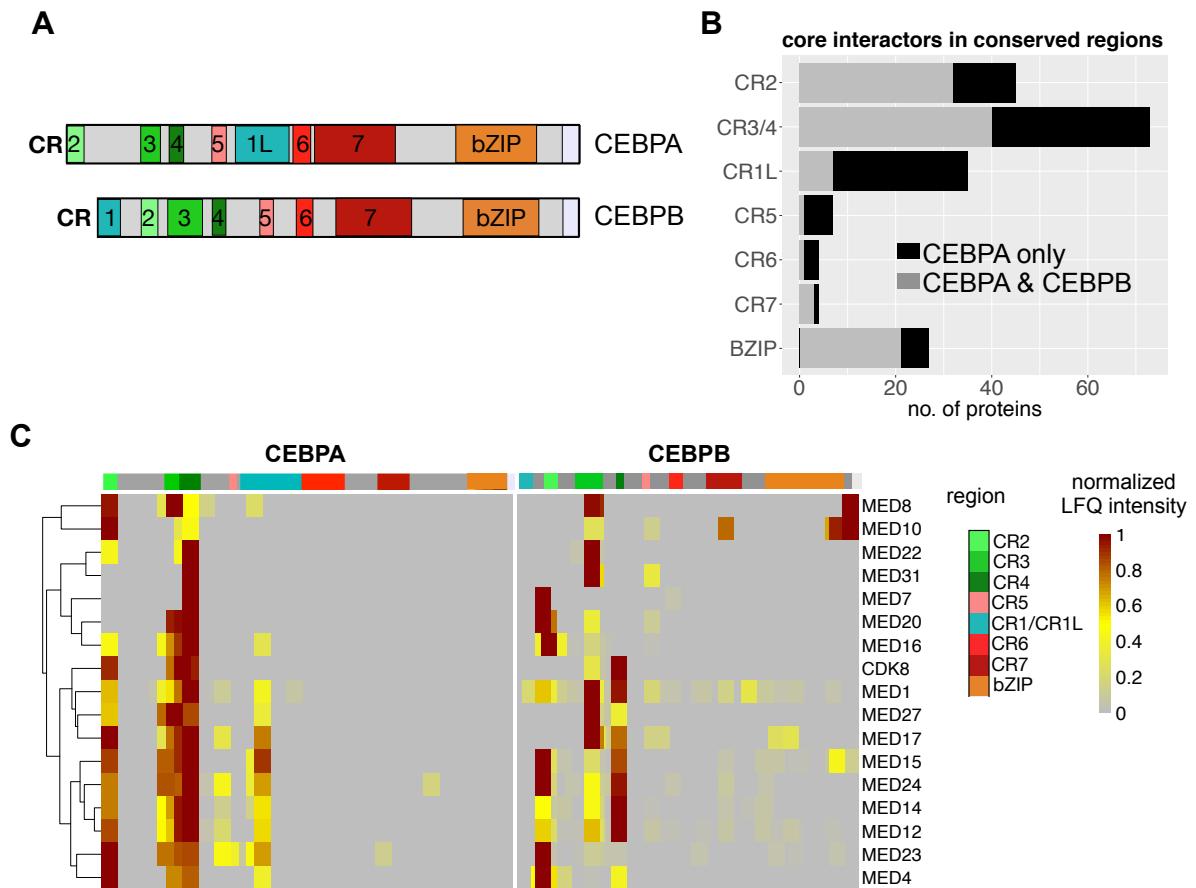

**Figure S3: CEBPA and CEBPB share interactors in homologous regions, Related to Figure 2**

A: Shared homology of conserved regions in CEBPA and CEBPB. B: Number of high-confidence CEBPA interactors per conserved region in CEBPA as detected by PRISMA and BioID (black bars). Grey bars represent interactors that were also identified as interactors in homologues regions in CEBPB (Dittmar et al., 2019). C: Extracted PRISMA binding profiles of Mediator complex subunits binding to CEBPA and CEBPB (right). Annotation bar on top indicates conserved regions

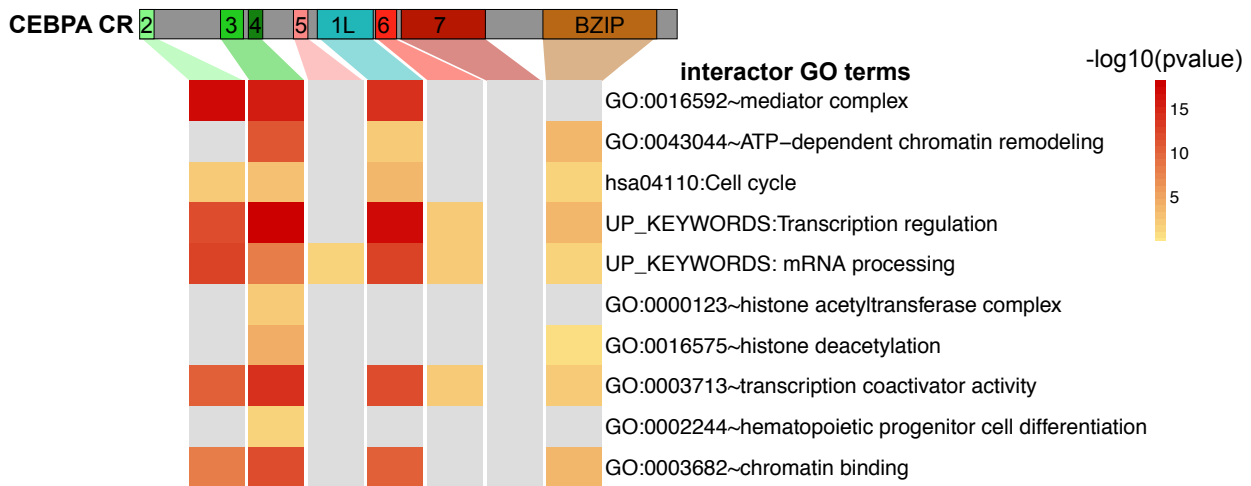

**Figure S4: GO term enrichment of mapped CEBPA interactors, Related to Figure 2**

PRISMA CEBPA interactors confirmed by BioID were subjected to GO term and domain analysis using the DAVID tool. Informative significant GO terms ( $p$  value  $< 0.05$ ) are displayed. Grey indicates no significant enrichment. No GO terms were significantly enriched in CR7 binders. A complete list of all significant GO terms and domains is available in Table S5.



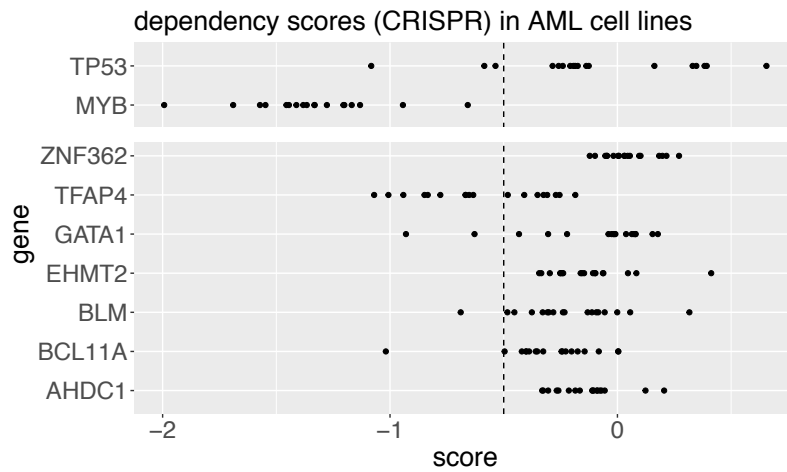

**Figure S5: CEBPA P30 specific interactors may represent therapeutic targets in AML, related to Figure 4**

Dependency scores from CRISPR knockout screens in AML cell lines extracted from the DepMap portal. Scores of P30 specific interactors are displayed. Known tumor-suppressor P53 and oncogene MYB are plotted on top as a reference.
